# Supplementary material for: Meta-Analysis Derived (MAD) Transcriptome of Psoriasis Defines the “Core” Pathogenesis of Disease
Source: PubMed Central journal article supplement (PMC3434204; doi:10.1371/journal.pone.0044274), 2012-09-05

Supplementary Figure 1

A

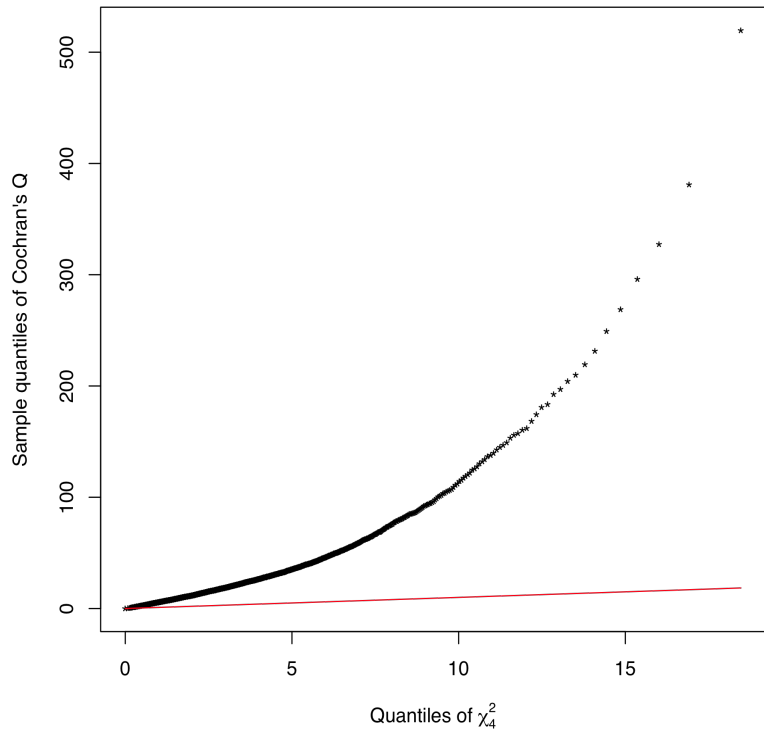

B

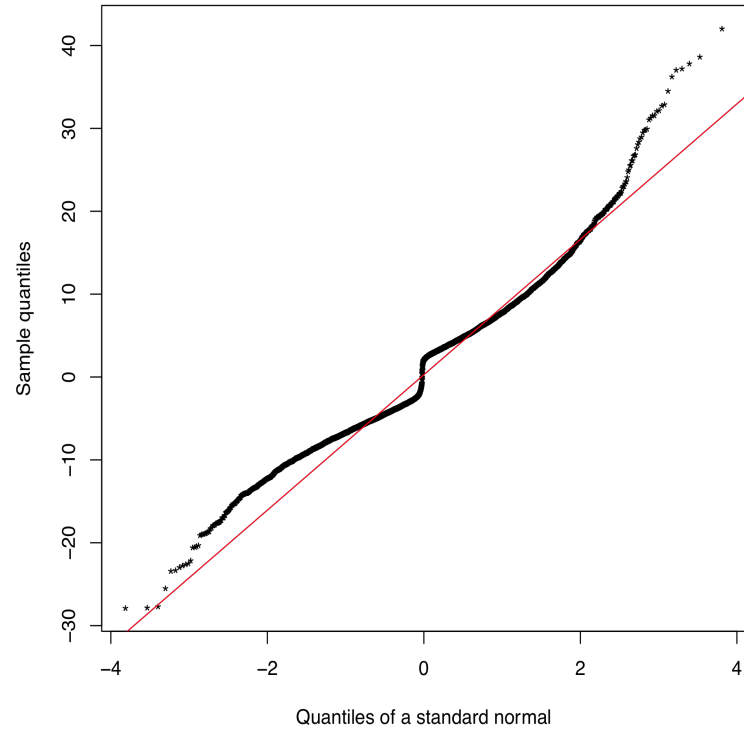

Supplement: pone.0044274.s001.pdf [file pone.0044274.s001.pdf]
