# Supplementary material for: Meta-Analysis Derived (MAD) Transcriptome of Psoriasis Defines the “Core” Pathogenesis of Disease
Source: PubMed Central journal article supplement (PMC3434204; doi:10.1371/journal.pone.0044274), 2012-09-05
Supplement: pone.0044274.s002.pdf [file pone.0044274.s002.pdf]

|                                               | Reischl                                  | Suarez-Farinas          | Yao                                  | Gudjonsson                                         | Suarez-Farinas +        |
|-----------------------------------------------|------------------------------------------|-------------------------|--------------------------------------|----------------------------------------------------|-------------------------|
| Platform                                      | hgu133a                                  | hgu133a2                | hgu133plus2                          | hgu133plus2                                        | hgu133plus2             |
| # of Chips                                    | 26                                       | 30                      | 52                                   | 116                                                | 162                     |
| # of Patients                                 | 13                                       | 15                      | 26                                   | 58                                                 | 81                      |
| GEO Accession #                               | GSE6710                                  | GSE11903                | GSE14905                             | GSE13355                                           |                         |
| Plaque Psoriasis                              | Mild to severe                           | Moderate to severe      | Plaque type                          | Chronic                                            | Moderate to severe      |
| Preprocessing Algorithm                       | MAS 5.0                                  | GCRMA                   | GCRMA<br>(ArrayAssist Lite software) | RMA (extra normalization for gender/batch effects) | GCRMA                   |
| Filtering                                     | SD>0.1<br>FC>2                           | SD>0.1                  | Not mentioned (NA)                   | Not mentioned (NA)                                 | SD>0.1                  |
| Statistical method                            | Paired t-test<br>Paired Wilcoxon test    | Moderated paired t-test | SAM<br>(R package's samr)            | Paired T-test                                      | Moderated paired t-test |
| Multiple Hypothesis' Correction               | None                                     | Benjamini-Hochberg      | Q-value were calculated              | Bonferroni correction                              |                         |
| Cutoffs:<br>FDR / p-value<br>Fold Change (FC) | p<0.00001 (t-test)<br>p<0.001 (Wilcoxon) | FDR<0.05<br>FCH>2       | Q-value <0.05<br>FCH>2               | FDR<0.05<br>FCH>2                                  | FDR<0.05<br>FCH>2       |
| # Up-regulated probe-sets (genes)             | 203 (179) <sup>1</sup>                   | 732 (579)               | 1408 (974)                           | 721 (508)                                          | 2129(1568)              |
| # of Down-regulated probe-sets (genes)        |                                          | 890 (702)               | 1465 (851)                           | 364 (247)                                          | 2046(1145)              |

<sup>1</sup> Only the total number of significantly expressed probe sets (genes) was given in the original paper.
