# Supplementary material for: Meta-Analysis Derived (MAD) Transcriptome of Psoriasis Defines the “Core” Pathogenesis of Disease
Source: PubMed Central journal article supplement (PMC3434204; doi:10.1371/journal.pone.0044274), 2012-09-05
Supplement: pone.0044274.s006.pdf [file pone.0044274.s006.pdf]

| TR                       | Type    | LR-Meta | PAS-Meta | Z-score Meta | p-Meta  | LR-S-F+ | PAS-S-F+ | Z-score S-F+ | p S-F+   | Target Meta                                                                                                                                                                                                                                                                                                                                                               | Target S-F+                                                                                                                                                                                                                                                                                                                                                                        |
|--------------------------|---------|---------|----------|--------------|---------|---------|----------|--------------|----------|---------------------------------------------------------------------------------------------------------------------------------------------------------------------------------------------------------------------------------------------------------------------------------------------------------------------------------------------------------------------------|------------------------------------------------------------------------------------------------------------------------------------------------------------------------------------------------------------------------------------------------------------------------------------------------------------------------------------------------------------------------------------|
| CDKN2A                   | TR      |         | Inh      | -2.958       | 2.3E-06 |         | Inh      | -3.19        | 1.37E-05 | ASF1B, ATAD2, AURKB, BCL2, BIRC5, BLM, CCL2, CCNA2, CCND1, CCNE1, CDCA5, CDK1, CENPK, DHFR, FBXO5, FEN1, FST, KCNK1, MCM4, MELK, MMP1 (includes EG:300339), PPFIBP1, RAB27A, RAD51AP1, RRM2, TFDP1, TK1, TMPO, ZNF655                                                                                                                                                     | ASF1B, ATAD2, BARD1, BCL2, BIRC5, BLM, CCL2, CCNA2, CCNE1, CDCA5, CDK1, CENPK, CITED2, DHFR, E2F2, FANCA, FBXO5, FEN1, FST, GPRC5A, KCNK1, MELK, MMP1 (includes EG:300339), NR3C1, PPFIBP1, RAB27A, RAD51AP1, RRM2, TCF19, TFDP1, TK1, TMPO, TP63, ZNF655                                                                                                                          |
| MYOCD                    | TR      | -3.33   | Inh      | -2.842       | 0.015   | -3.330  | Inh      | -2.50        | 3.30E-01 | ACTA1, ACTA2, CNN1 (includes EG:1264), FOS, MYH11, TAGLN, TNNT2                                                                                                                                                                                                                                                                                                           | ACTA2, CACNA1D, MYH11, TAGLN, TNNT2                                                                                                                                                                                                                                                                                                                                                |
| Nr1h                     | group   |         | Inh      | -2.504       | 0.0221  |         | Inh      | 0.00         |          | APOC1, APOD, APOE, CCL5, CXCL1, IL8, LPL                                                                                                                                                                                                                                                                                                                                  | APOC1, APOD, APOE, CCL5, CXCL1, IL8, LPL                                                                                                                                                                                                                                                                                                                                           |
| RB1                      | TR      |         | Inh      | -2.505       | 9.6E-07 |         | Inh      | -3.18        | 1.51E-05 | ASF1B, ATAD2, BCL2, BIRC5, BLM, CCNA2, CCNB1, CCND1, CCNE1, CDC6 (includes EG:23834), CDCA5, CDK1, CENPK, CYP27B1, DHFR, F3, FBXO5, FEN1, FOS, FST, ID1, IVL, KCNK1, KIT, LACTB, LCK, MCM10 (includes EG:307126), MCM4, MCM5, MELK, PPFIBP1, RAB27A, RAD51, RAD51AP1, RRM2, SOX7, TFDP1, TMPO, TYMS, ZNF655                                                               | ASF1B, ATAD2, BARD1, BCL2, BIRC5, BLM, CASP4, CBX5, CCNA2, CCNB1, CCNE1, CDCA5, CDK1, CENPK, CITED2, CYP27B1, DHFR, F3, FANCA, FBXO5, FEN1, FST, GPRC5A, ID1, IVL, KCNK1, KRT4, LCK, MCM10 (includes EG:307126), MCM2, MCM5, MELK, MYC, PPFIBP1, PPT2 (includes EG:100126133), RAB27A, RAD51, RAD51AP1, RBL2 (includes EG:100331892), RRM2, SOX7, TCF19, TFDP1, TMPO, TYMS, ZNF655 |
| Smad2/3-Smad4            | complex |         | Inh      | -2.329       | 0.0564  |         | Inh      | -2.25        | 4.91E-02 | BCL2, COL1A2, IGFBP5, ITGB5                                                                                                                                                                                                                                                                                                                                               | BCL2, COL1A2, IGFBP5, ITGB5, MYC                                                                                                                                                                                                                                                                                                                                                   |
| SMAD3                    | TR      |         | Inh      | -2.978       | 0.00289 |         | Inh      | -2.73        | 3.38E-02 | ACTA2, ASPN, COL1A2, FBLN1, FOS, FST, GZMA, GZMB, HMOX1, ID1, ITGB5, MMP1 (includes EG:300339), POR, RHOB, TIMP3, TPM1 (includes EG:22003), TPM2                                                                                                                                                                                                                          | ASPN, COL1A2, FBLN1, FST, GLI2, GZMA, GZMB, HMOX1, ID1, ITGB5, MMP1 (includes EG:300339), MYC, POR, TGF2, TIMP3, TPM1 (includes EG:22003), TPM2                                                                                                                                                                                                                                    |
| SMARCB1                  | TR      |         | Inh      | -3.136       | 4.4E-10 |         | Inh      | -3.04        | 2.76E-05 | ADD3, CCNA2, CCND1, CDC6 (includes EG:23834), CDK1, CDT1, CENPA, CENPE, CXCR4, DACH1, DHFR, F11R, FABP4, FZD7, HBEFG, KIF11, KIF23, MCM10 (includes EG:307126), MCM4, MCM5, MMP1 (includes EG:300339), MX1, OAS1, OAS3, POSTN, PPARG, PTN, RAD51AP1, SGGC, SMC4, TFDP1                                                                                                    | ACTR2, ADD3, CCNA2, CDK1, CDT1, CENPA, CENPE, DHFR, DOCK4, F11R, FABP4, FZD7, HBEFG, KIF11, KIF23, MCM10 (includes EG:307126), MCM2, MCM5, MMP1 (includes EG:300339), MX1, OAS1, OAS3, POSTN, PTN, RAD51AP1, SGGC, SMC4, TFDP1                                                                                                                                                     |
| MLL2                     | TR      |         | Inh      | -2.163       | 0.0231  |         |          | -1.94        | 3.90E-04 | CRIP1, CRIP2, FHL1 (includes EG:14199), PCDH7, PPP2R2B, TNNT2                                                                                                                                                                                                                                                                                                             | CRIP1, CRIP2, CSPG4, CTSD, FABP3, FHL1 (includes EG:14199), NPR3 (includes EG:18162), PCDH7, PPP2R2B, TNNT2                                                                                                                                                                                                                                                                        |
| SRF                      | TR      |         | Inh      | -2.571       | 0.0008  |         |          | -1.29        | 6.90E-03 | ACTA1, ACTC1, ACTG2, AKAP12, ARHGAP20, BCL2, CALD1, CNN1 (includes EG:1264), CYLD, DMD, FOS, FOSL1, LMCD1, MCL1, MGST1, MYH11, MYLK, RAI2, TAGLN, TNNT2                                                                                                                                                                                                                   | ACTC1, ACTG2, BCL2, CYLD, DUSP5, FOSL1, MCL1, MYH11, MYLK, TAGLN, TNNT2                                                                                                                                                                                                                                                                                                            |
| GATA4                    | TR      |         | Inh      | -2.576       | 0.048   |         |          | 0.00         |          | ACTA1, ACTC1, ACTG2, GATA3, MUC4, TAGLN                                                                                                                                                                                                                                                                                                                                   |                                                                                                                                                                                                                                                                                                                                                                                    |
| FOXO3                    | TR      |         |          | -1.143       | 1.3E-05 |         | Inh      | -2.63        | 1.37E-06 | AR, BIRC5, CCNB1, CCND1, EIF4EBP1, FBXO32, FOXM1, FOXO1 (includes EG:2308), GRB14, HMGC52, IL8, IRS2, LCN2, MKI67, MMP9, MXD1, OVOL1, PLAU, PPARGC1A, SOD2, TNFSF10, TXNIP, UBE2C                                                                                                                                                                                         | AR, BIRC5, CAT, CCNB1, CCNG2, CFLAR, CPT1A, EIF4EBP1, FBXO32, FOXM1, FOXO1 (includes EG:2308), GRB14, HMGC52, IL8, IRS2, LCN2, MKI67, MMP9, MXD1, MYC, OVOL1, PLAU, PPARGC1A, RBL2 (includes EG:100331892), SLC7A1, SMAD4, SOD2, TGF2, TXNIP, UBE2C                                                                                                                                |
| WT1                      | TR      |         |          | -1.837       | 0.0474  |         | Inh      | -2.02        | 2.29E-01 | AREG/AREGB, BAK1, BCL2, CCND1, CCNE1, EREG, HBEFG, MMP9, NTRK2                                                                                                                                                                                                                                                                                                            | AREG/AREGB, BCL2, CCNE1, EREG, HBEFG, IGF2, MMP9, MYC, NTRK2                                                                                                                                                                                                                                                                                                                       |
| Ap1                      | complex |         | Act      | 2.046        | 7.1E-05 |         | Act      | 2.19         | 1.42E-02 | BAK1, BCL2A1, CCL2, CCL4, CCNA2, CCND1, F3, FABP4, FOS, FOSL1, GZMB, HMOX1, IL17D, IL18, IL8, KRT18, KRT6A, MMP1 (includes EG:300339), MMP9, PLAU, PRDM1, SELE (includes EG:20339), SLC8A1                                                                                                                                                                                | BCL2A1, CCL2, CCNA2, DEFB103A/DEFB103B, F3, FABP4, FOSL1, GZMB, HMOX1, IL8, KCNN4, KRT18, KRT6A, MMP1 (includes EG:300339), MMP9, MYC, NR3C1, PLAU, PRDM1, SELE (includes EG:20339), SLC8A1                                                                                                                                                                                        |
| EZH2                     | TR      |         | Act      | 2.659        | 4.4E-05 |         | Act      | 2.91         | 3.46E-03 | ALOX5AP, BIRC3, C15orf48, CA6, CCND1, CCNE2, CLEC3B, CXCL1, CXCL10, CXCL11, CXCL2, CYP1B1, FBLN1, FHOD3, FRZB, GPR68, IKZF1, IL17A, IL8, KIAA1199, KRT6B, LCN2, LT, LYPD6B, MPZL2, NCOA7, PCDH20, PPP2R2B, RBM5, SERPINA1, TBX3                                                                                                                                           | BIRC3, C15orf48, CA6, CCNE2, CHRM3, CLEC3B, CSNK1A1, CXCL1, CXCL10, CXCL2, CYP1B1, FBLN1, FHOD3, FRZB, GPR68, HSD11B2, IKZF1, IL8, KIAA1199, KRT6B, LCN2, LYPD6B, MMP7, MPZL2, MYC, NCOA7, PPP2R2B, RBM5, SAA1, SERPINA1, SLC1A3, TRIM38                                                                                                                                           |
| FOXM1                    | TR      | 4.91    | Act      | 2.539        | 1.3E-08 | 4.910   | Act      | 3.19         | 5.08E-05 | AURKB, BIRC5, CCNA2, CCNB1, CCNB2, CCND1, CCNE2, CDC20, CDC25B, CDK1, CDKN3, CENPA, CENPF, FOXM1, KIF20A, MMP9, NEK2, PRC1 (includes EG:233406)                                                                                                                                                                                                                           | BIRC5, CCNA2, CCNB1, CCNB2, CCNE2, CDC20, CDK1, CDKN3, CENPA, CENPF, FOXM1, KIF20A, MMP9, MYC, NEK2, PRC1 (includes EG:233406)                                                                                                                                                                                                                                                     |
| FOXO1 (includes EG:2308) | TR      | -2.88   | Act      | 3.044        | 3.4E-11 | -2.880  | Act      | 2.43         | 5.34E-08 | ALAS1, ANLN, ASPM, BCL2, BCL2A1, BID, BIRC3, BIRC5, BRIP1, CCNB1, CCNB2, CCND1, CDK1, CENPF, DEPDC1, DLGAP5, EIF4EBP1, FBXO32, FOXO1 (includes EG:2308), HUS1, IL17A, IRS2, KIF11, MCM5, MMP1 (includes EG:300339), NCAPG, NEK2, NUSAP1, OVOL1, PCK1 (includes EG:18534), PPARG, PPARGC1A, PRC1 (includes EG:233406), SOD2, SPC25 (includes EG:100144563), TNFSF10, TXNIP | ALAS1, ASPM, BCL2, BCL2A1, BCL2L13, BID, BIRC3, BIRC5, BRIP1, CCNB1, CCNB2, CCNG2, CDK1, CENPF, CFLAR, CITED2, DEPDC1, DLGAP5, EIF4EBP1, FBXO32, FOXO1 (includes EG:2308), HUS1, IRS2, KIF11, MCM5, MMP1 (includes EG:300339), MYC, NCAPG, NEK2, NUSAP1, OVOL1, PPARGC1A, PRC1 (includes EG:233406), RPS6KA3, SMAD4, SOD2, SPC25 (includes EG:100144563), TXNIP                    |
| HMGB1                    | TR      |         | Act      | 2.759        | 0.00188 |         | Act      | 2.12         | 5.49E-02 | CCL2, CCL20, CCL4, CD83, IFIT1, IL1B, IL8, MMP1 (includes EG:300339), MMP9, SELE (includes EG:20339), TLR2                                                                                                                                                                                                                                                                | CCL2, CCL20, CD83, IFIT1, IL8, MIA, MMP1 (includes EG:300339), MMP9, SELE (includes EG:20339), TLR2                                                                                                                                                                                                                                                                                |
| IRF1 (includes EG:16362) | TR      | 5.93    | Act      | 3.029        | 2.5E-13 | 5.930   | Act      | 2.82         | 4.18E-06 | BAK1, BCL2, CASP1, CCL19, CCL5, CEACAM1 (includes others), CXCL10, IDO1, IFI35, IFIH1, IFIT1, IFIT3, IL1B, IL8, IRF1 (includes EG:16362), IRF7, IRF9, ISG15, MMP9, MX1, OAS1, OAS2, PLA2G16, PSMB10, PSME2, RSAD2, SLPI, SOCS1, STAT1, STAT3, TAP2, TNFSF10, TRIM22                                                                                                       | BCL2, CASP1, CEACAM1 (includes others), CXCL10, IFI35, IFIH1, IFIT1, IFIT3, IFIT5, IL8, IRF1 (includes EG:16362), IRF7, IRF9, ISG15, MMP9, MX1, OAS1, OAS2, PLA2G16, PSMB10, RSAD2, SLPI, SOCS1, STAT1, STAT3, TAP2, TRIM22                                                                                                                                                        |
| IRF3                     | TR      |         | Act      | 2.861        | 6.8E-07 |         | Act      | 2.50         | 2.61E-06 | ARG2 (includes EG:11847), BIRC3, CCL19, CCL2, CCL5, CXCL1, CXCL10, FST, FUT2, GBP1, IFI44, IFI6, IFIT1, IFIT3, IL8, IRF7, ISG15, ISG20, MARCH6, MMP9, PNP, RSAD2, TIMP3, TMPO, TSLP                                                                                                                                                                                       | AHNAK, ARG2 (includes EG:11847), BIRC3, CCL2, CCL5, CDH11, CXCL1, CXCL10, FGF1, FST, FUT2, GBP1, IFI44, IFI6, IFIT1, IFIT3, IL8, IRF7, ISG15, ISG20, MARCH6, MMP9, NR3C1, PMAIP1, PNP, RSAD2, SORL1, TIMP3, TMPO                                                                                                                                                                   |
| IRF5                     | TR      |         | Act      | 2.359        | 1.1E-07 |         | Act      | 2.06         | 3.19E-03 | BAK1, CCL19, CCL4, CXCL11, IFI44, IFIT1, ISG15, NAMPT, OAS1, PLSCR1, PRKRA, RSAD2, SP110, TMPO, TNFSF10                                                                                                                                                                                                                                                                   | IFI44, IFIT1, ISG15, NAMPT, OAS1, PLSCR1, PMAIP1, PRKRA, RSAD2, SP110, TMPO                                                                                                                                                                                                                                                                                                        |

|                |         |       |     |       |         |        |     |      |          |                                                                                                                                                                                                                                                                                                                                                                                                                                                                                                                                                                                                                                                                            |                                                                                                                                                                                                                                                                                                                                                                                                                                                                                                                                                                                                                                                           |
|----------------|---------|-------|-----|-------|---------|--------|-----|------|----------|----------------------------------------------------------------------------------------------------------------------------------------------------------------------------------------------------------------------------------------------------------------------------------------------------------------------------------------------------------------------------------------------------------------------------------------------------------------------------------------------------------------------------------------------------------------------------------------------------------------------------------------------------------------------------|-----------------------------------------------------------------------------------------------------------------------------------------------------------------------------------------------------------------------------------------------------------------------------------------------------------------------------------------------------------------------------------------------------------------------------------------------------------------------------------------------------------------------------------------------------------------------------------------------------------------------------------------------------------|
| IRF7           | TR      | 7.11  | Act | 5.61  | 4.8E-20 | 7.110  | Act | 5.87 | 1.71E-13 | APOBEC3G, CARD16, CCL19, CCL5, CXCL10, DDX58, GBP1, GBP3, GBP5, HERC5, IDO1, IFI35, IFI44, IFI44L, IFI6, IFIH1, IFIT1, IFIT3, IRF1 (includes EG:16362), IRF8, IRF9, ISG15, ISG20, MCL1, MICB, MX1, MX2, NAMPT, NMI, OAS1, OAS2, OAS3, OASL, PLSCR1, PSMB10, PSME2, RSAD2, RTP4, S100A8, SOCS1, STAT1, TAP2, TMPO, TNFSF10, TRIM22, UBE2L6, USP18, XAF1, ZC3HAV1                                                                                                                                                                                                                                                                                                            | BCL2L13, CARD16, CASP4, CCL5, CXCL10, DDX58, GBP1, GBP3, GBP5, HERC5, IFI35, IFI44, IFI44L, IFI6, IFIH1, IFIT1, IFIT3, IRF1 (includes EG:16362), IRF8, IRF9, ISG15, ISG20, MCL1, MICB, MX1, MX2, NAMPT, NMI, OAS1, OAS2, OAS3, OASL, PLSCR1, PMAIP1, PSMB10, RSAD2, RTP4, S100A8, SOCS1, STAT1, TAP2, TMPO, TRIM21, TRIM22, UBE2L6, USP18, XAF1, ZC3HAV1                                                                                                                                                                                                                                                                                                  |
| NFKB (complex) | complex |       | Act | 4.818 | 2.2E-14 |        | Act | 5.37 | 1.47E-05 | BAK1, BCL2, BCL2A1, BCL3, BIRC3, BIRC5, CCL2, CCL20, CCL22, CCL4, CCL5, CCL8, CCNB1, CCNB2, CCND1, CD274, CD83, CDC25B, CEBPD, CFTR, COL1A2, CXCL1, CXCL10, CXCL11, CXCL2, CXCL9, CXCR4, CYLD, DEFB4A/DEFB4B, E2F7, EHF, ELF3, ELL2, EPCAM, F3, FOS, FST, GATA3, GCH1, HERC5, HMOX1, IKKBE, IL17A, IL19, IL1B, IL1RN, IL32, IL7R, IL8, IRF1 (includes EG:16362), IRF7, ITGAL, KIT, KRT17, KRT6A, LCN2, LSP1 (includes EG:16985), LTB, MCL1, MFHAS1, MMP1 (includes EG:300339), MMP9, MYLK, NAMPT, NCF2, NCOA7, NFKBIZ, NOS1, PLAU, PPARG, PPIF, REL, SDC4, SELE (includes EG:20339), SERPINA3, SLIT2, SOAT1, SOCS1, SOCS3, SOD2, TAP2, TLR2, TNFSF10, TSLP, WNT5A, ZC3H12A | ABCGB1, BCL2, BCL2A1, BCL3, BIRC3, BIRC5, CCL2, CCL20, CCL22, CCL5, CCL8, CCNB1, CCNB2, CD274, CD83, CEBPD, CFB, CFLAR, COL1A2, CSNK2A1, CXCL1, CXCL10, CXCL2, CXCL9, CYLD, DEFB103A/DEFB103B, DEFB4A/DEFB4B, E2F7, EHF, ELF3, ELL2, EPCAM, F3, FGF1, FGF2, FST, GLI2, HERC5, HMOX1, IKKBE, IL19, IL1RN, IL7R, IL8, IRF1 (includes EG:16362), IRF7, ITGAL, KRT17, KRT6A, LCN2, LSP1 (includes EG:16985), MCL1, MFHAS1, MMP1 (includes EG:300339), MMP9, MTSS1, MYC, MYLK, NCF2, NCOA7, PECAM1, PLAU, PMAIP1, PPIF, SAA1, SELE (includes EG:20339), SERPINA3, SLC2A5, SLC7A1, SLIT2, SOAT1, SOCS1, SOCS3, SOD2, TACR1, TAP2, TLR2, TNFRSF4, WNT5A, ZC3H12A |
| RELA           | TR      |       | Act | 3.72  | 1.2E-08 |        | Act | 2.57 | 9.31E-05 | BCL2, BCL2A1, BCL3, BIRC3, CCL19, CCL2, CCL20, CCL5, CCND1, CFTR, COL1A2, CTSB, CXCL1, CXCL10, CXCL11, CXCL2, CXCL9, CXCR4, DEFB4A/DEFB4B, EHF, ELF3, F3, IKKBE, IL1B, IL1RN, IL20, IL32, IL7R, IL8, IRF1 (includes EG:16362), KIT, KRT15, LTB, MMP1 (includes EG:300339), MMP9, MUC1, NAMPT, NOD2, PI3, PLAU, PPARG, PSMB10, SDC4, SELE (includes EG:20339), SOD2, TAP2, TLR2, TSLP                                                                                                                                                                                                                                                                                       | BCL2, BCL2A1, BCL3, BIRC3, CAV1, CCL2, CCL20, CCL5, COL1A2, CTSB, CXCL1, CXCL10, CXCL2, CXCL9, DEFB4A/DEFB4B, EHF, ELF3, F3, FGF2, GLI2, IKKBE, IL1RN, IL7R, IL8, IRF1 (includes EG:16362), KRT15, MIA, MMP1 (includes EG:300339), MMP9, MUC1, MYC, NF2, NFKBIB, NOD2, PECAM1, PI3, PLAU, PLD1, PSMB10, SELE (includes EG:20339), SELP, SLC2A5, SOD2, TACR1, TAP2, TLR2, TNFRSF10A, TNFRSF4                                                                                                                                                                                                                                                               |
| STAT2          | TR      |       | Act | 2.377 | 1.3E-11 |        | Act | 2.36 | 5.24E-08 | BCL2, CCL19, CXCL10, GBP1, IFI27, IFI35, IFI6, IFIT1, IFIT3, IL8, IRF1 (includes EG:16362), IRF9, ISG15, MX1, OAS1, TNFSF10                                                                                                                                                                                                                                                                                                                                                                                                                                                                                                                                                | BCL2, CXCL10, GBP1, IFI27, IFI35, IFI6, IFIT1, IFIT3, IL8, IRF1 (includes EG:16362), IRF9, ISG15, MX1, OAS1                                                                                                                                                                                                                                                                                                                                                                                                                                                                                                                                               |
| TBX21          | TR      |       | Act | 2.132 | 0.00174 |        | Act | 0.00 |          | GATA3, GZMB, IL12RB1, IL12RB2, PRF1, RORC, SELPLG                                                                                                                                                                                                                                                                                                                                                                                                                                                                                                                                                                                                                          | GATA3, GZMB, IL12RB1, IL12RB2, PRF1, RORC, SELPLG                                                                                                                                                                                                                                                                                                                                                                                                                                                                                                                                                                                                         |
| FOSL1          | TR      | 18.2  | Act | 2.1   | 0.00244 | 18.200 |     | 1.83 | 5.22E-02 | <b>CYP2J2, FOS, IL8, IVL, MMP9, SPRR1B, THBD</b>                                                                                                                                                                                                                                                                                                                                                                                                                                                                                                                                                                                                                           | CYP2J2, IL8, IVL, MMP9, SPRR1B, THBD                                                                                                                                                                                                                                                                                                                                                                                                                                                                                                                                                                                                                      |
| E2F1           | TR      |       |     | 1.763 | 7.1E-06 |        | Act | 2.28 | 5.87E-06 | AR, AURKA, AURKB, BAK1, BCL2, BID, BIRC5, CALD1, CCNA2, CCNB1, CCND1, CCNE1, CCNE2, CDC6 (includes EG:23834), CDK1, CHEK1, CRYAB, CTNNBIP1, CTSB, CYP27B1, DHFR, ECT2, FBXO5, FEN1, FHL1 (includes EG:14199), FOXM1, GINS1, H19, HELLS, HN1, JMY, KIAA0101, LACTB, LCK, MAD2L1, MCL1, MCM10 (includes EG:307126), MCM4, MCM5, MMP1 (includes EG:300339), NDC80, RAD51, RRM2, SELE (includes EG:20339), SMC4, SOX7, TGM1, TK1, TOP2A, TYMS                                                                                                                                                                                                                                  | ACTR1A, AR, AURKA, BCL2, BID, BIRC5, BUB3 (includes EG:12237), CBX5, CCNA2, CCNE1, CCNE2, CCNO, CDK1, CFLAR, CHEK1, CRYAB, CTSB, CYP27B1, DBF4 (includes EG:10926), DHFR, DNMT1, E2F2, ECT2, ENO2, FBXO5, FEN1, FGF2, FHL1 (includes EG:14199), FOXM1, GINS1, H19, HELLS, HN1, JMY, KIAA0101, LCK, MAD2L1, MCL1, MCM10 (includes EG:307126), MCM2, MCM5, MMP1 (includes EG:300339), MMP16, MYC, NDC80, PAWR, PPT2 (includes EG:100126133), RAD51, RBBP4, RPS16, RRM2, SELE (includes EG:20339), SMC4, SOX7, STAM, TGM1, TK1, TOP2A, TXNL1, TYMS, VCP, WWOX                                                                                                |
| NfkB1-RelA     | complex |       |     | 1.678 | 0.00126 |        | Act | 2.36 | 1.06E-02 | CCL2, CCL5, CCND1, CXCL1, DEFB4A/DEFB4B, IL8, MMP1 (includes EG:300339), SELE (includes EG:20339)                                                                                                                                                                                                                                                                                                                                                                                                                                                                                                                                                                          | <b>CCL2, CCL5, CXCL1, DEFB4A/DEFB4B, IL8, MMP1 (includes EG:300339), MYC, SELE (includes EG:20339)</b>                                                                                                                                                                                                                                                                                                                                                                                                                                                                                                                                                    |
| STAT1          | TR      | 11.79 |     | 1.649 | 7E-12   | 11.790 | Act | 2.60 | 1.65E-05 | APOBEC3G, APOE, BIRC5, CASP1, CCL19, CCL2, CCND1, CD274, CXCL10, DEFB4A/DEFB4B, FOS, GBP1, IDO1, IFI27, IFI35, IFI6, IL17A, IL1B, IL8, IRF1 (includes EG:16362), IRF7, IRF8, IRF9, ISG15, MMP9, MUC4, PTN, SERPINA3, SERPINB3, SERPINB4, SOAT1, SOCS1, TNFSF10, TRIM22, WARS                                                                                                                                                                                                                                                                                                                                                                                               | <b>BIRC5, CASP1, CCL2, CD274, CXCL10, DEFB103A/DEFB103B, DEFB4A/DEFB4B, GBP1, IFI27, IFI35, IFI6, IL8, IRF1 (includes EG:16362), IRF7, IRF8, IRF9, ISG15, MMP9, MYC, PMAIP1, PTN, SERPINA3, SERPINB3, SERPINB4, SOAT1, SOCS1, TLR3, TRIM22, TYMP, WARS</b>                                                                                                                                                                                                                                                                                                                                                                                                |
| STAT3          | TR      | 7.47  |     | 1.829 | 1.7E-22 | 7.470  | Act | 2.96 | 3.48E-15 | ANGPTL4, ARG2 (includes EG:11847), BCL2, BIRC5, CCL2, CCL5, CCNB1, CCND1, CCR5, CD274, CD83, CDK1, CEACAM1 (includes others), CEBPD, CTSB, CXCL10, CXCL13, CXCL2, CXCL9, FERMT2, FOS, HERC5, HK2, HMOX1, IFI27, IFI35, IFI44, IFI6, IFIH1, IFIT1, IFIT3, IL17A, IL4R, IL8, IRF1 (includes EG:16362), IRF7, ISG15, ISG20, LILRB2, MCL1, MMP9, MUC1, MX1, MX2, MYD88, NAMPT, OAS1, OAS2, OAS3, OASL, PLAU, PLAUR, PLSCR1, PTN, RAB27A, RORA, RORC, SERPINA3, SERPINB1, SERPINB3, SERPINB4, SERPINB9, SOCS3, SOD2, SP110, STAT1, STAT3, THBD, TNFSF10, TRIM14, TRIM22, WNT5A, XAF1                                                                                            | <b>ANGPTL4, ARG2 (includes EG:11847), BCL2, BIRC5, CCL2, CCL5, CCNB1, CD274, CD83, CDK1, CEACAM1 (includes others), CEBPD, CFLAR, CTSB, CXCL10, CXCL13, CXCL2, CXCL9, DNMT1, HERC5, HK2, HMOX1, IFI27, IFI35, IFI44, IFI6, IFIH1, IFIT1, IFIT3, IFIT5, IL4R, IL8, IRF1 (includes EG:16362), IRF7, ISG15, ISG20, LILRB2, MCL1, MMP9, MUC1, MX1, MX2, MYC, MYD88, NAMPT, OAS1, OAS2, OAS3, OASL, PLAU, PLAUR, PLSCR1, PMAIP1, PTN, RAB27A, RORA, SERPINA3, SERPINB1, SERPINB3, SERPINB4, SERPINB9, SOCS3, SOD2, SP110, STAT1, STAT3, THBD, THBS1, TRIM14, TRIM22, WNT5A, XAF1</b>                                                                           |
| NANOG          | TR      |       |     |       |         | -2.590 | Act | 2.45 | 2.42E-01 |                                                                                                                                                                                                                                                                                                                                                                                                                                                                                                                                                                                                                                                                            | BIRC5, COL3A1, DLX5, GATA6, ISL1, LGALS1, LHX2, MAP1B, PDCD4, ZFHX3                                                                                                                                                                                                                                                                                                                                                                                                                                                                                                                                                                                       |
| NR0B2          | TR      |       |     |       |         |        | Act | 2.27 | 4.78E-01 |                                                                                                                                                                                                                                                                                                                                                                                                                                                                                                                                                                                                                                                                            | ESRRG, FOXO1 (includes EG:2308), PDK4, PPARGC1A                                                                                                                                                                                                                                                                                                                                                                                                                                                                                                                                                                                                           |
