# Supplementary material for: Meta-Analysis Derived (MAD) Transcriptome of Psoriasis Defines the “Core” Pathogenesis of Disease
Source: PubMed Central journal article supplement (PMC3434204; doi:10.1371/journal.pone.0044274), 2012-09-05
Supplement: pone.0044274.s007.pdf [file pone.0044274.s007.pdf]

**A.**

| Symbol   |                                                                 | S-F     | Reischl | Gudjonsson            | S-F+    | Yao     |
|----------|-----------------------------------------------------------------|---------|---------|-----------------------|---------|---------|
| ACTC1    | actin, alpha, cardiac muscle 1                                  | -0.1673 | -0.1278 | -0.3167               | -0.6487 | -0.1295 |
| AKR1B10  | aldo-keto reductase family 1, member B10 (aldose reductase)     | 0.0371  | 0.0459  | 0.0311                | -0.0161 | 0.1221  |
| CCL27    | chemokine (C-C motif) ligand 27                                 | -0.4934 | -0.4076 | -0.6941               | -0.5561 | -0.5388 |
| CHRNA9   | cholinergic receptor, nicotinic, alpha 9                        | 0.3508  | 0.1513  | 0.2825                | 0.1221  | 0.5233  |
| CLDN8    | claudin 8                                                       | -0.1281 | -0.0641 | -0.084                | -0.0546 | -0.1192 |
| CXCL10   | chemokine (C-X-C motif) ligand 10                               | 0.0265  | 0.0072  | 0.0712                | 0.0973  | 0.0478  |
| CXCL9    | chemokine (C-X-C motif) ligand 9                                | 0.0291  | 0.019   | 0.0527                | 0.0574  | 0.0518  |
| CYP2E1   | cytochrome P450, family 2, subfamily E, polypeptide 1           | 0.044   | 0.0281  | 0.0947                | 0.2629  | 0.0402  |
| IFI44L   | interferon-induced protein 44-like                              | 0.0334  | 0.0767  | 0.1869                | 0.2798  | 0.1733  |
| KLRB1    | killer cell lectin-like receptor subfamily B, member 1          | 0.0061  | 0.0023  | 0.006                 | 0.0474  | 0.0182  |
| KYNU     | kynureninase                                                    | 0.0535  | 0.0561  | 0.0277                | 0.0598  | 0.1029  |
| MUC7     | mucin 7, secreted                                               | -0.0603 | -0.0161 | 0.0024                | -0.0273 | -0.0287 |
| NLRP2    | NLR family, pyrin domain containing 2                           | 0.0013  | 0.0015  | -0.0029               | 0.0278  | 0.0023  |
| POSTN    | periostin, osteoblast specific factor                           | -0.099  | -0.0702 | -0.0847               | -0.1676 | -0.2085 |
| RSAD2    | radical S-adenosyl methionine domain containing 2               | 0.0811  | 0.0643  | 0.1298                | 0.248   | 0.0268  |
| S100A12  | S100 calcium binding protein A12                                | 0.458   | 0.4196  | 0.6377                | 0.6108  | 0.6139  |
| SERPINB3 | serpin peptidase inhibitor, clade B (ovalbumin), member 3       | 0.0016  | 0.0017  | 6.00×10 <sup>-4</sup> | -0.0019 | 0.008   |
| SERPINB4 | serpin peptidase inhibitor, clade B (ovalbumin), member 4       | 0.0086  | 0.012   | 0.0435                | 0.0544  | 0.0215  |
| TCN1     | transcobalamin I (vitamin B12 binding protein, R binder family) | 0.0401  | 0.062   | 0.0681                | 0.054   | 0.0558  |
| VNN1     | vanin 1                                                         | 0.0419  | 0.0127  | 0.0199                | 0.1208  | 0.0547  |

**B.**

|         | Training |    |        | Cross-Validation |    |       |
|---------|----------|----|--------|------------------|----|-------|
|         | LS       | NL | Error  | LS               | NL | Error |
| General | 1        | 1  | 0.58%  | 2                | 3  | 1.3 % |
| S-F     | 0        | 0  | 0 %    | 0                | 0  | 0 %   |
| T       | 0        | 0  | 0 %    | 0                | 0  | 0 %   |
| S-F+    | 1        | 1  | 0.61 % | 2                | 1  | 1.9 % |
| G       | 0        | 0  | 0 %    | 0                | 1  | 0.9 % |
